# Supplementary material for: Polybenzimidazole/Nafion hybrid membrane with improved chemical stability for vanadium redox flow battery application
Source: Royal Society of Chemistry journal article supplement (doi:10.1039/c8ra03921f), 2018-01-01

Supporting Information

Polybenzimidazole/Nafion hybrid membrane with improved chemical stability for vanadium  
redox flow battery application

Su Min Ahn<sup>a,b,1</sup>, Hwan Yeop Jeong<sup>a,1</sup>, Jung Kyu Jang<sup>a</sup>, Jang Yong Lee<sup>a</sup>, Soonyong So<sup>a</sup>,  
Young Jun Kim<sup>b</sup>, Young Taik Hong<sup>a,\*</sup>, Tae-Ho Kim<sup>a,\*\*</sup>

<sup>a</sup> Membrane Research Center, Korea Research Institute of Chemical Technology (KRICT),  
141 Gajeong-ro, Yuseong-gu, Daejeon 34114, Republic of Korea

<sup>b</sup> School of Chemical Engineering, Sungkyunkwan University, Suwon, Kyunggi 440-746,  
Republic of Korea

\*Corresponding author

E-mail addresses: ythong@kRICT.re.kr (Y.T. Hong).

\*\*Corresponding author

E-mail addresses: thkim@kRICT.re.kr (T.-H. Kim)

<sup>1</sup>These authors contributed equally to this work.

**Fig. S1 – SEM images of pristine (a)Nafion surface and (b)BIpPBI surface of B20N5 (c)  
XPS graph of BIpPBI surface**

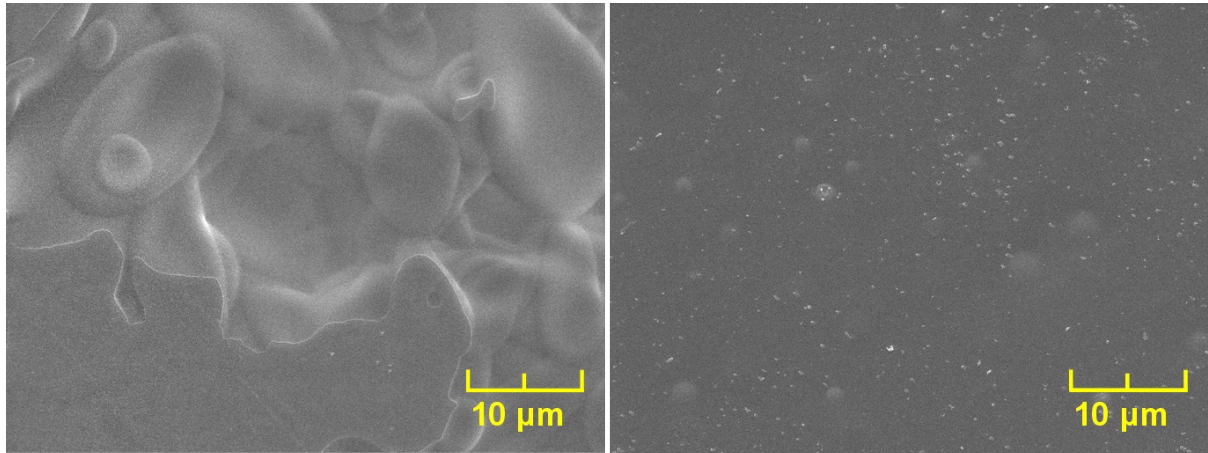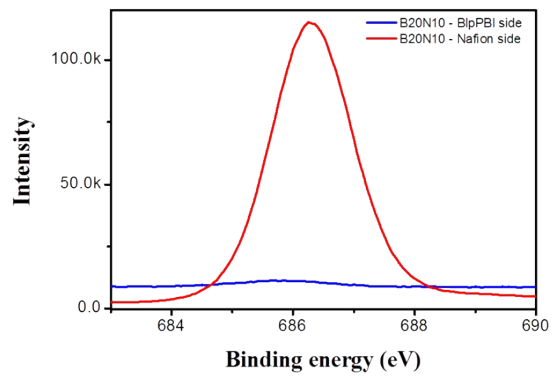

Fig. S2 – Schematics of ex situ chemical stability testing apparatus: (a)cylindrical test tube filled with 1M  $\text{VO}_2^+$ /5M  $\text{H}_2\text{SO}_4$  solution, (b)metal container, and (c)cylindrical test tube assembled in the metal container; (d)BIpPBI membrane before (left) and after (right) the test; (e)membranes before (left) and after (right) the test; SEM images of B20N10 after the test for (f)Nafion coated surface and (g)cross section.

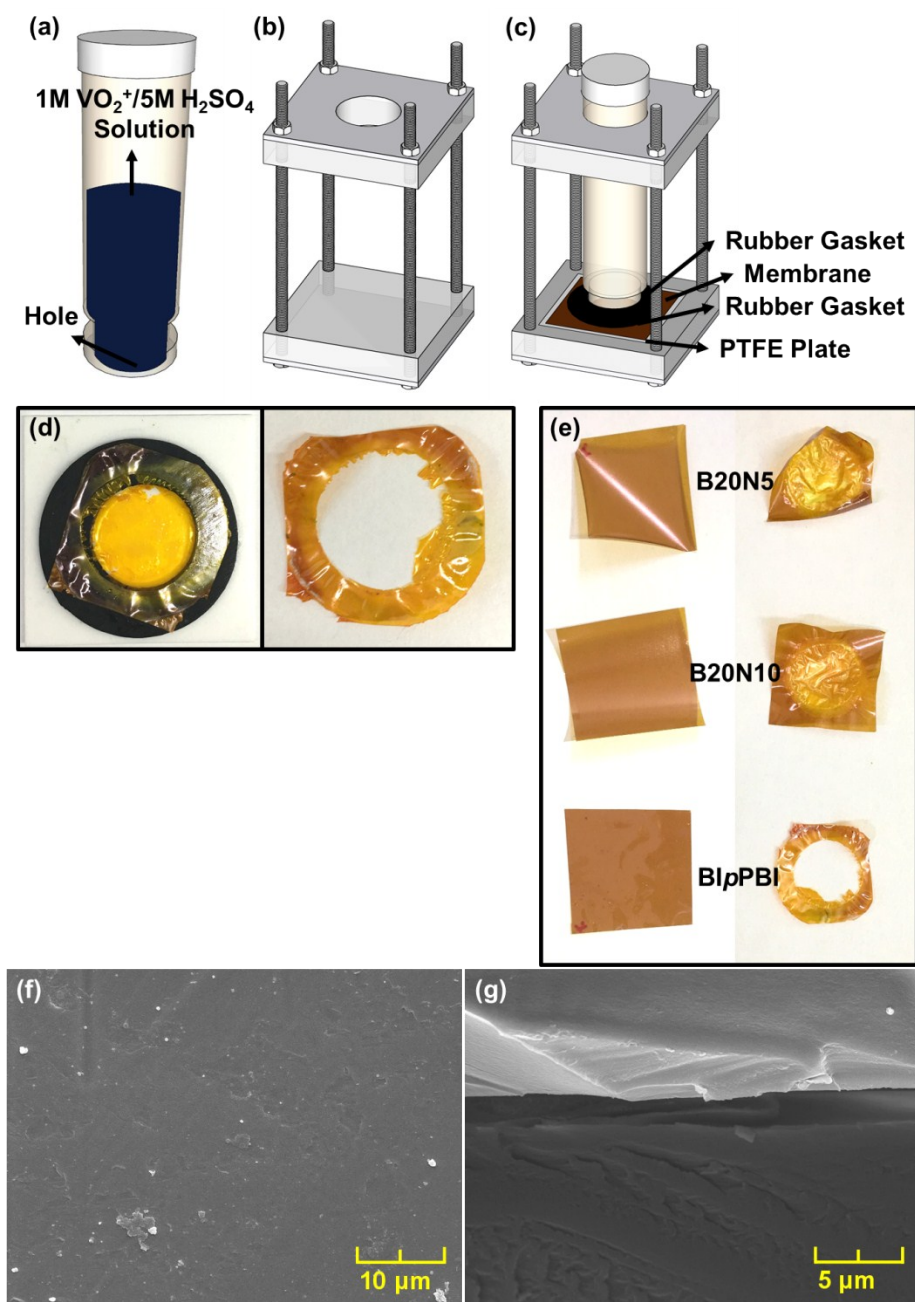

When the cylindrical test tube (Fig. S2a) is assembled into the metal container (Fig. S2b), the

container is screwed tightly to prevent leakage between the test tube and the membrane. Also, to prevent leakage, a rubber gasket with a hole in the middle was placed above and beneath the membrane, and underneath the rubber gasket a chemically stable PTFE plank was planted to protect the metal container from chemical degradation. The ex situ chemical stability test begins with pouring 20 mL of 1M  $\text{VO}_2^+$ /5M  $\text{H}_2\text{SO}_4$  solution in the cylindrical test tube, after setting up the testing apparatus with the membrane inserted, shown in Fig. S2c.

**Fig. S3 – SEM images after VRFB performance test of B20N5 membrane’s (a)Nafion surface, (b)BIpPBI surface, and (c)cross section; BIpPBI membrane’s (d)surface and (e)cross section.**

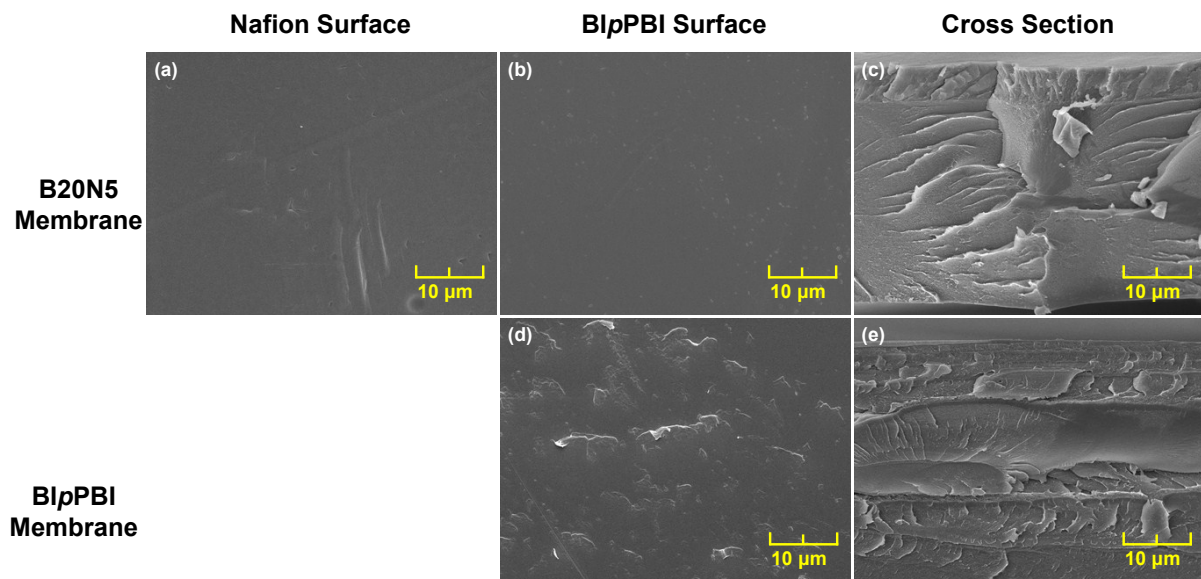

**Fig. S4 –Cycling test result of VRFB single cells BI*p*PBI and B20N10 membranes at 60 mA cm<sup>-2</sup>: (a) BI*p*PBI efficiency, (b) B20N10 efficiency, (a') BI*p*PBI capacity retention, (b') B20N10 capacity retention, and cell voltage of (a'') BI*p*PBI and (b'') B20N10 during charging and discharging after 300 cycles.**

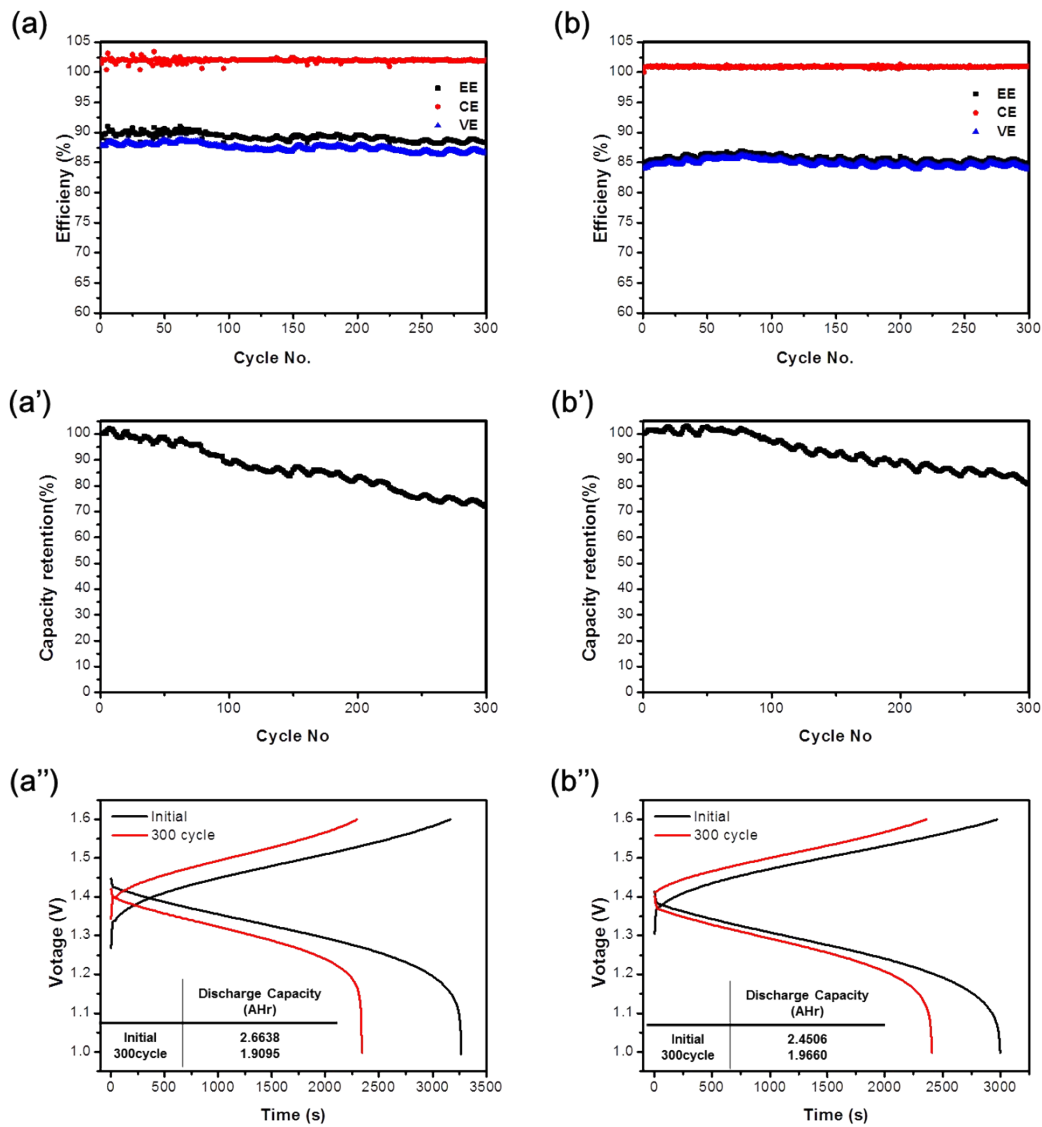

Supplement: c8ra03921f1.pdf [file c8ra03921f1.pdf]
